# Supplementary material
Source: PubMed Central journal article supplement (PMC3082635)
Supplement: NIHMS285307-supplement-Supl_Data.pdf [file NIHMS285307-supplement-Supl_Data.pdf]

Supplementary Figure 1: ROC curves for OC, EPE, SV+, LN+ for the model with categorical PSA and the model with continuous PSA. The first row is based on JHH data and the second row is based on UCHE data.

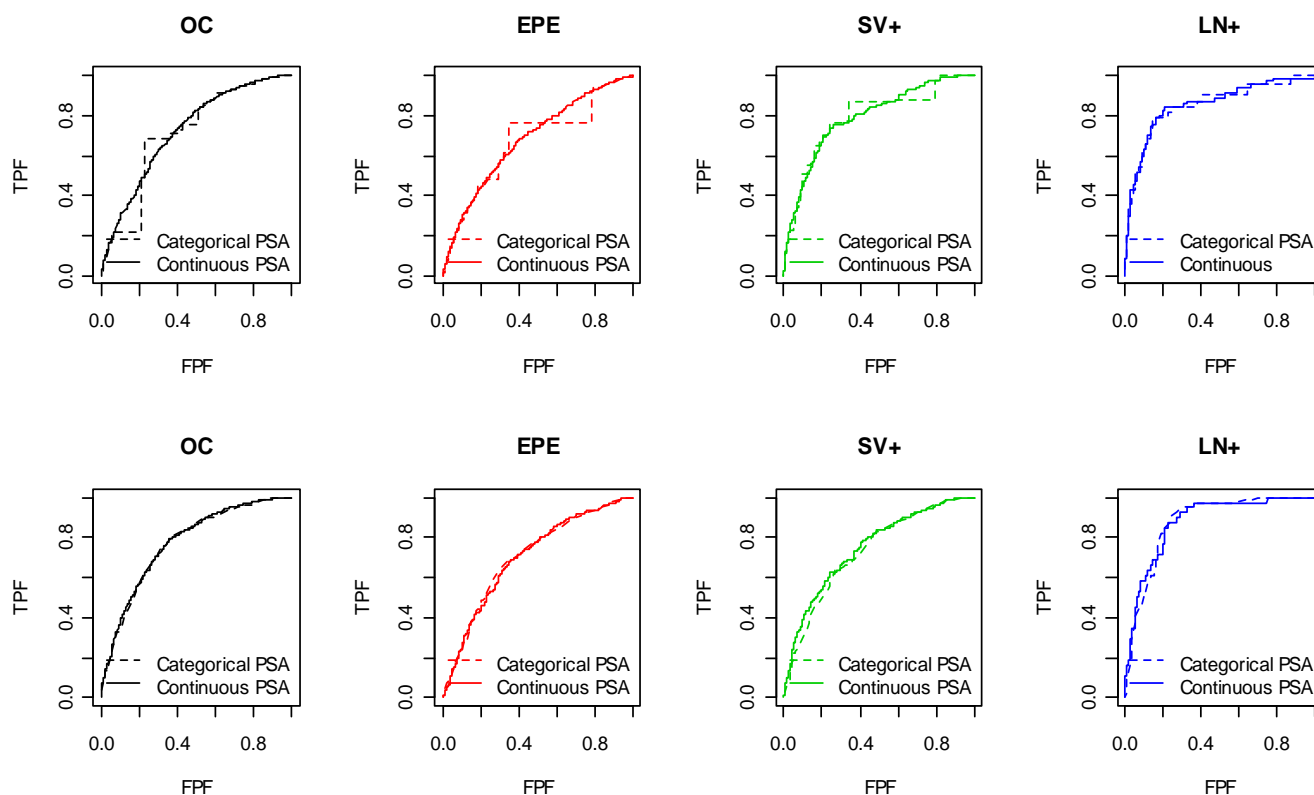

|            | Area under ROC Curves-JHH Cohort |                     |         | Area under ROC Curves-UCHE Cohort |                     |         |
|------------|----------------------------------|---------------------|---------|-----------------------------------|---------------------|---------|
|            | Categorical PSA                  | Continuous PSA      | P Value | Categorical PSA                   | Continuous PSA      | P Value |
| <b>OC</b>  | 0.718 (0.678-0.755)              | 0.723 (0.707-0.738) | 0.800   | 0.770 (0.752-0.788)               | 0.773 (0.755-0.790) | 0.183   |
| <b>EPE</b> | 0.691 (0.654-0.726)              | 0.680 (0.663-0.696) | 0.471   | 0.703 (0.680-0.725)               | 0.700 (0.677-0.722) | 0.242   |
| <b>SV+</b> | 0.789 (0.745-0.826)              | 0.791 (0.752-0.825) | 0.835   | 0.731 (0.701-0.760)               | 0.748 (0.718-0.776) | <0.001  |
| <b>LN+</b> | 0.849 (0.793-0.893)              | 0.855 (0.799-0.898) | 0.617   | 0.876 (0.835-0.908)               | 0.877 (0.837-0.908) | 0.949   |
